# Supplementary material for: Comparative Analysis of Felixounavirus Genomes Including Two New Members of the Genus That Infect Salmonella Infantis
Source: MDPI journal article supplement (doi:10.3390/antibiotics10070806), 2021-07-02
Supplement: s1 [file s1]

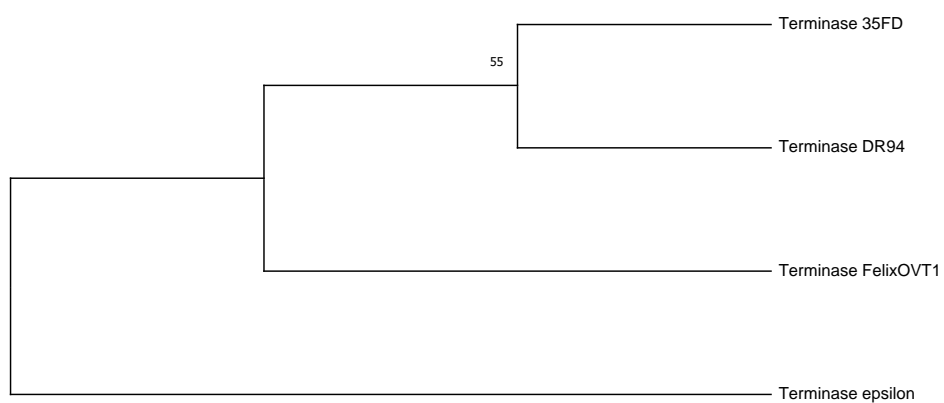

**Supplemental Figure 1:** Phylogenetic tree of the large subunit of terminase for phages vB\_Si\_35FD, vB\_Si\_DR94 and FelixOVT1. Phage vB\_Ec\_epsilon15 is the outgroup. Bootstrap test (1000 replicates).
